# Supplementary material for: Anomalous effects of water flow through charged nanochannel membranes
Source: Royal Society of Chemistry journal article supplement (doi:10.1039/c4ra02856b), 2014-01-01
Supplement: c4ra02856b1.pdf [file c4ra02856b1.pdf]

## Supporting Information

# Anomalous Effects of Water Flow through Charged Nanochannel Membranes

*Meng Yang, Xiaohai Yang\*, Qing Wang, Kemin Wang\*, Xin Fan, Wei Liu, Xizhen Liu, Jianbo Liu, Jin  
Huang*

State Key Laboratory of Chemo/Biosensing and Chemometrics, College of Chemistry and Chemical  
Engineering, Key Laboratory for Bio-Nanotechnology and Molecular Engineering of Hunan Province,  
Hunan University, Changsha 410082, China

AUTHOR EMAIL ADDRESS: [kmwang@hnu.edu.cn](mailto:kmwang@hnu.edu.cn)  
[yangxiaohai@hun.edu.cn](mailto:yangxiaohai@hun.edu.cn)

**Legends:**

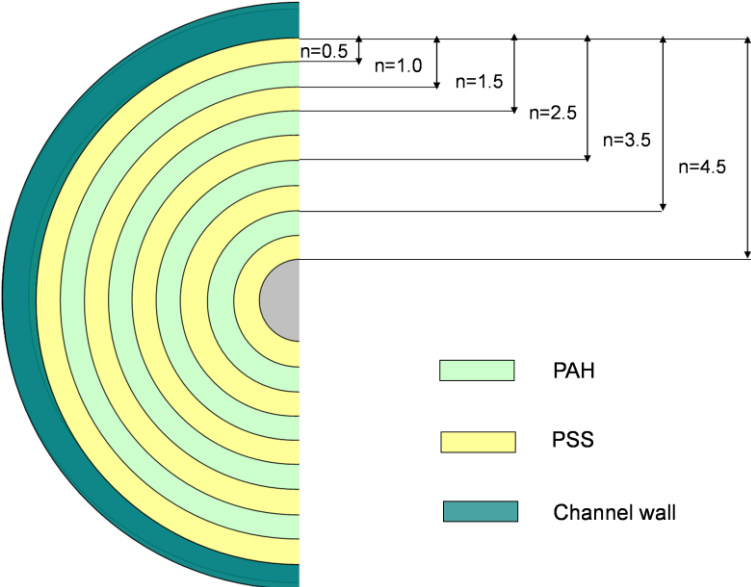

**Figure S1.** Illustration of the number of deposited n(PSS/PAH) multilayer in the nanochannel membrane.

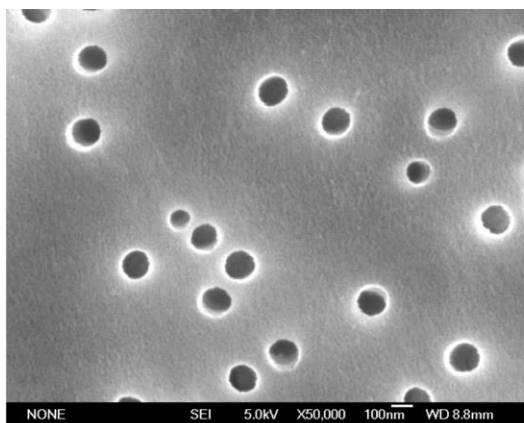

**100nm PC**

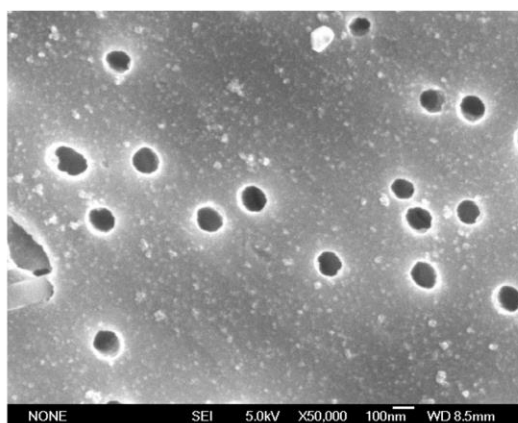

**0.5(PSS/PAH)**

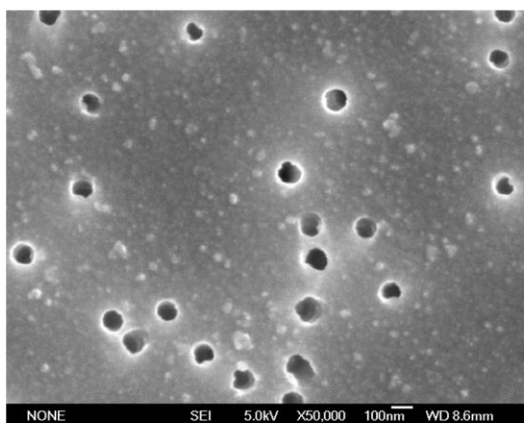

**1.5(PSS/PAH)**

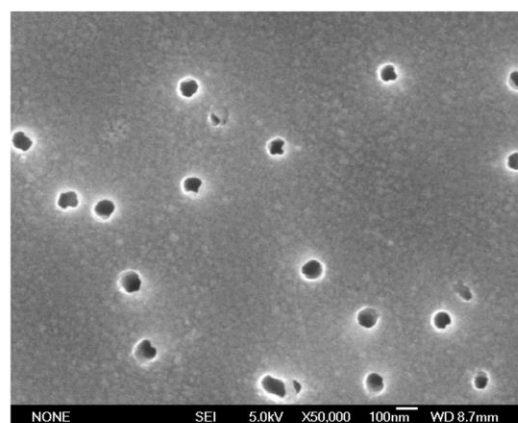

**2.5(PSS/PAH)**

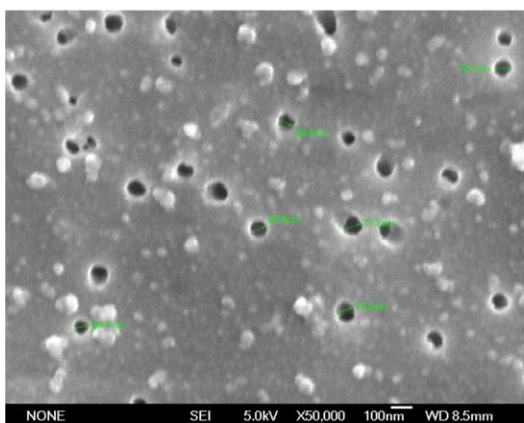

**3.5(PSS/PAH)**

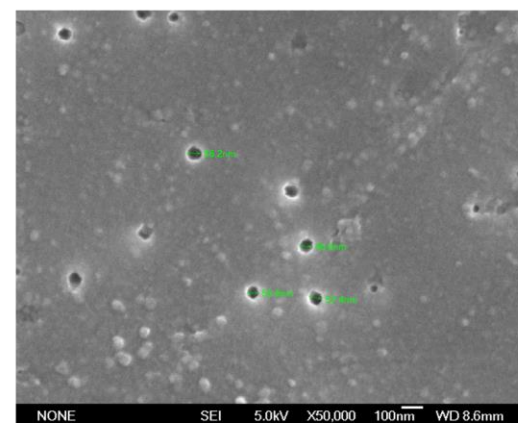

**4.5(PSS/PAH)**

**Figure S2.** SEM images of  $n$ (PSS/PAH) multilayer coated 100 nm TEPC membranes.

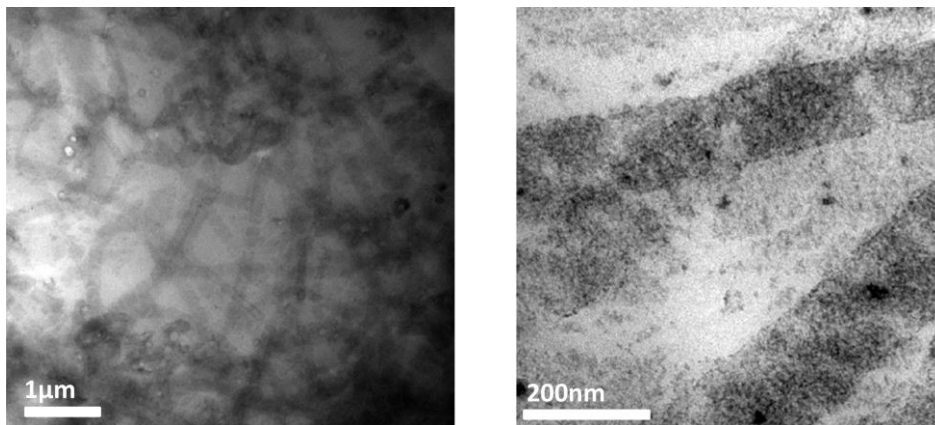

**Figure S3.** TEM images of 3.5(PSS/PAH) nanotubes. 3.5(PSS/PAH) multilayer coated 100 nm TEPC membranes were treated with dichloromethane to liberate the nanotubes. Subsequent nanotubes were imaged using TEM.

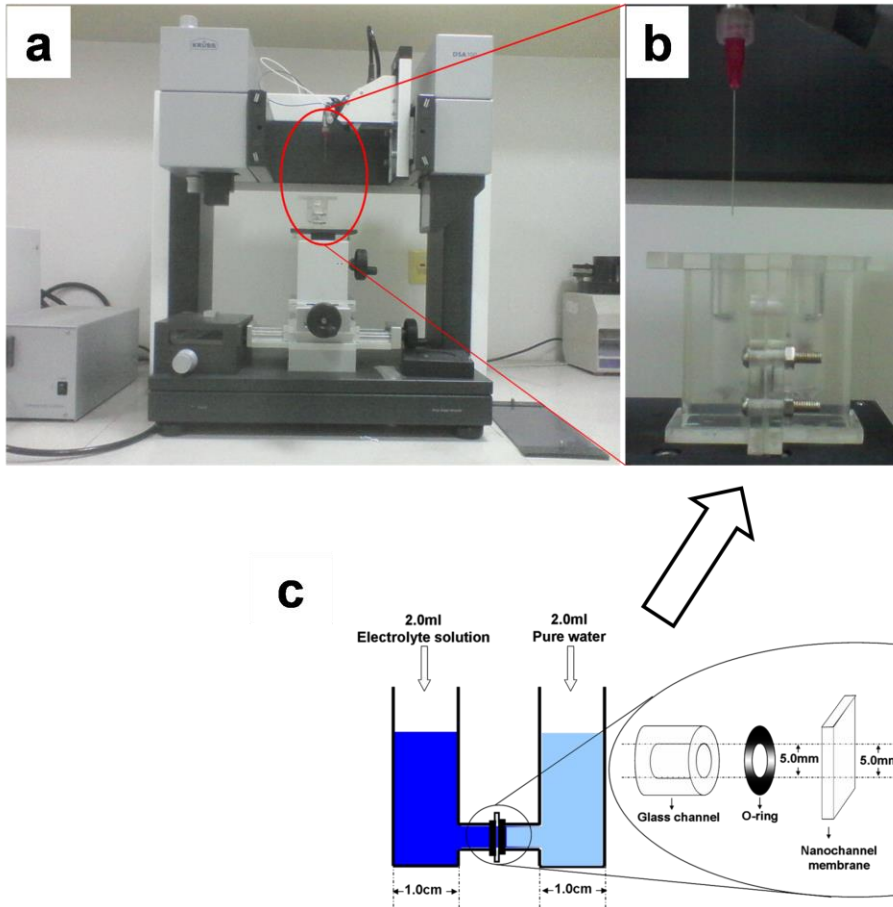

**Figure S4.** Photograph of the experimental system used to measure the liquid levels in two half-cells. **a.** DSA 100 Contact Angle Measuring System. **b.** A needle in the instrument was used to indicate the liquid level. **c.** Schematic representation of cell for water transport experiments.

**Table S1. Ionic conductivity and diffusion coefficient at infinite dilution**

|                  | $\lambda$                           | D                                 |                                             | $\lambda$                           | D                                 |
|------------------|-------------------------------------|-----------------------------------|---------------------------------------------|-------------------------------------|-----------------------------------|
| Ion              | $10^{-4}\text{m}^2\text{Smol}^{-1}$ | $10^{-5}\text{cm}^2\text{s}^{-1}$ | Ion                                         | $10^{-4}\text{m}^2\text{Smol}^{-1}$ | $10^{-5}\text{cm}^2\text{s}^{-1}$ |
|                  | cations                             |                                   |                                             | anions                              |                                   |
| H <sup>+</sup>   | 349.65                              | 9.311                             | Cl <sup>-</sup>                             | 76.31                               | 2.032                             |
| Li <sup>+</sup>  | 38.66                               | 1.029                             | NO <sub>3</sub> <sup>-</sup>                | 71.42                               | 1.092                             |
| Na <sup>+</sup>  | 50.08                               | 1.334                             | SO <sub>4</sub> <sup>2-</sup>               | 80.0                                | 1.065                             |
| K <sup>+</sup>   | 73.48                               | 1.957                             | HSO <sub>4</sub> <sup>2-</sup>              | 52.0                                | 1.385                             |
| Mg <sup>2+</sup> | 53.0                                | 0.706                             | PO <sub>4</sub> <sup>3-</sup>               | 92.8                                | 0.824                             |
| Ca <sup>2+</sup> | 59.47                               | 0.792                             | HPO <sub>4</sub> <sup>2-</sup>              | 57.0                                | 0.759                             |
| Sr <sup>2+</sup> | 59.4                                | 0.791                             | H <sub>2</sub> PO <sub>4</sub> <sup>-</sup> | 36.0                                | 0.959                             |
| Ba <sup>2+</sup> | 63.6                                | 0.847                             |                                             |                                     |                                   |

[Lide, D. R.; Weast, R. C. *Handbook of Chemistry and Physics*, p304-305. CRC Press: 2002.]
